# Supplementary material for: MLL-AF4 cooperates with PAF1 and FACT to drive high-density enhancer interactions in leukemia
Source: PubMed Central journal article supplement (PMC10457349; doi:10.1038/s41467-023-40981-9), 2023-08-25
Supplement: 41467_2023_40981_MOESM3_ESM.pdf [file 41467_2023_40981_MOESM3_ESM.pdf]

### **Description of Additional Supplementary Files**

File Name: Supplementary Data 1

Description: MLL-AF4 bound enhancers common between MLL-AF4 ALL patient samples, annotated with nearest gene.

File Name: Supplementary Data 2

Description: Proteins identified in IP-MS screen.
